# Supplementary material for: PI3K Isoform-Specific Regulation of Leader and Follower Cell Function for Collective Migration and Proliferation in Response to Injury
Source: MDPI journal article supplement (doi:10.3390/cells11213515), 2022-11-07
Supplement: s1 [file s1]

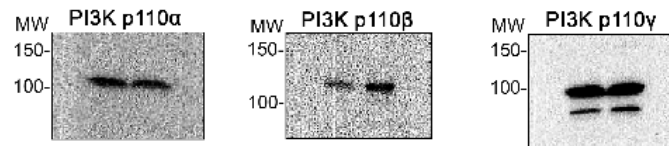

Supplemental Figure S1: PI3K class I isoform expression in response to cataract surgery wounding. Western blot analysis shows that class I PI3K p110 isoforms, p110 $\alpha$ , p110 $\beta$  and p110 $\gamma$  are all expressed in the lens in response to injury (Time 0).

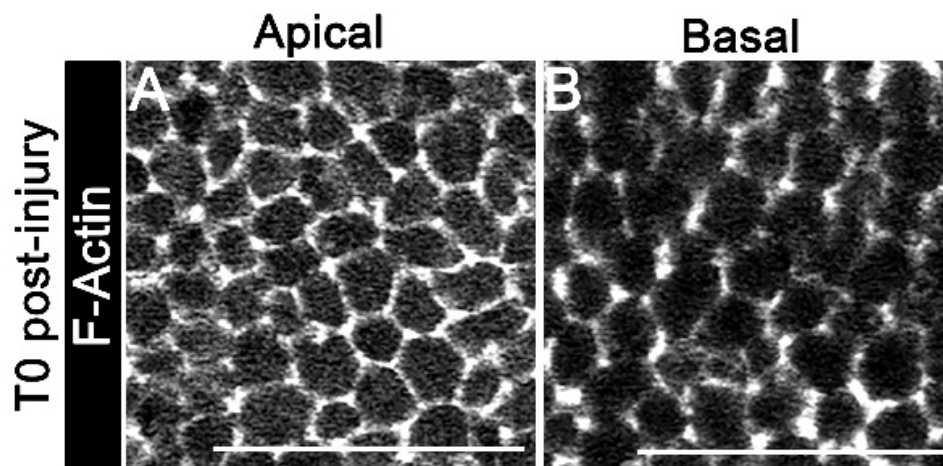

Supplemental Figure S2: F-Actin organization within wounded lens epithelial cells at T0 post-injury. Cultures were labeled with phalloidin to detect F-actin (F-actin, white, A,B). Confocal images within the OAZ show the distribution of F-actin at the apical (A) and basal (B) aspects of the wounded epithelium. Magnification bar: 20 $\mu$ m (A, B).
